# Supplementary material
Source: PubMed Central journal article supplement (PMC7451135)
Supplement: NIHMS1587836-supplement-2.pdf [file NIHMS1587836-supplement-2.pdf]

# Supplementary Figures

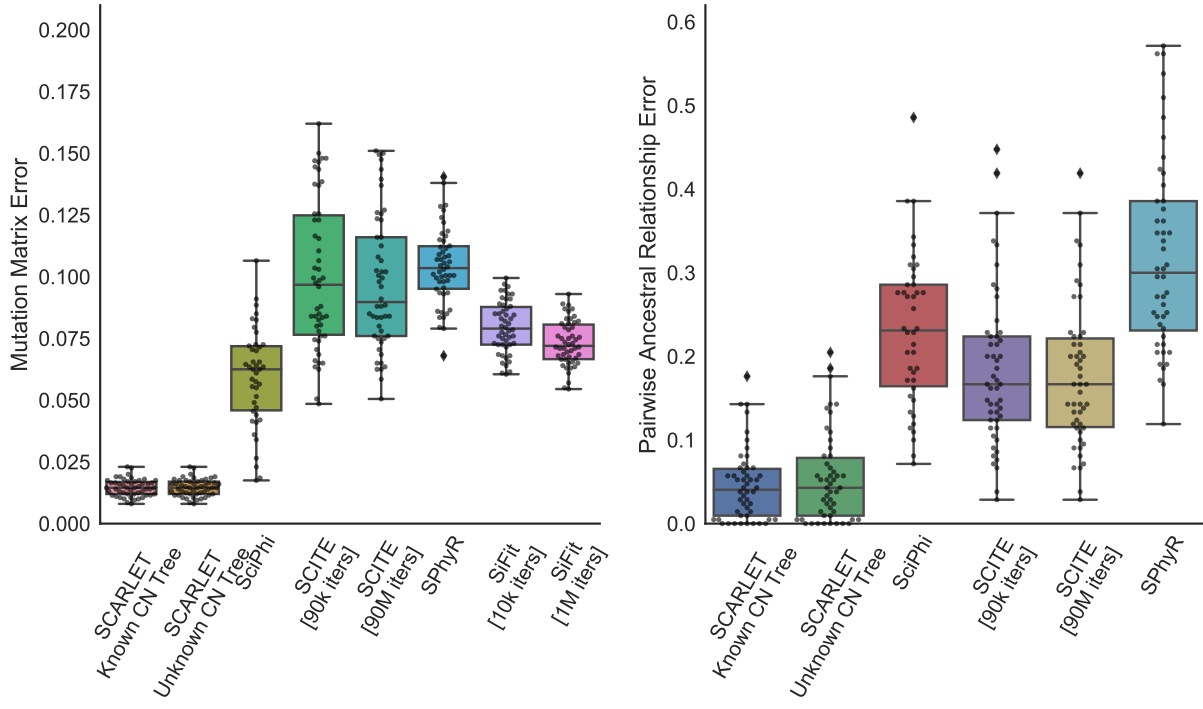

Figure 1: SCARLET Results on Simulated Data, with extended runtime of SCITE and SiFit. Related to Figure 2.
